# Supplementary material for: Do Multiple Sex/Gender Dimensions Play a Role in the Association of Green Space and Self-Rated Health? Model-Based Recursive Partitioning Results from the KORA INGER Study
Source: MDPI journal article supplement (doi:10.3390/ijerph20075241), 2023-03-23
Supplement: s1 [file s1]

# Supplementary Material S3

## Containing Supplementary Figures S1-S2 and Supplementary Tables S1-S3

Article: " Do multiple sex/gender-dimensions play a role in the association of green space and self-rated health? Model-based recursive partitioning results from the KORA INGER study"

Lisa Dandolo, Klaus Telkmann, Christina Hartig, Sophie Horstmann, Sara Pedron, Lars Schwettmann, Peter Selsam, Alexandra Schneider, Gabriele Bolte on behalf of the INGER Study Group

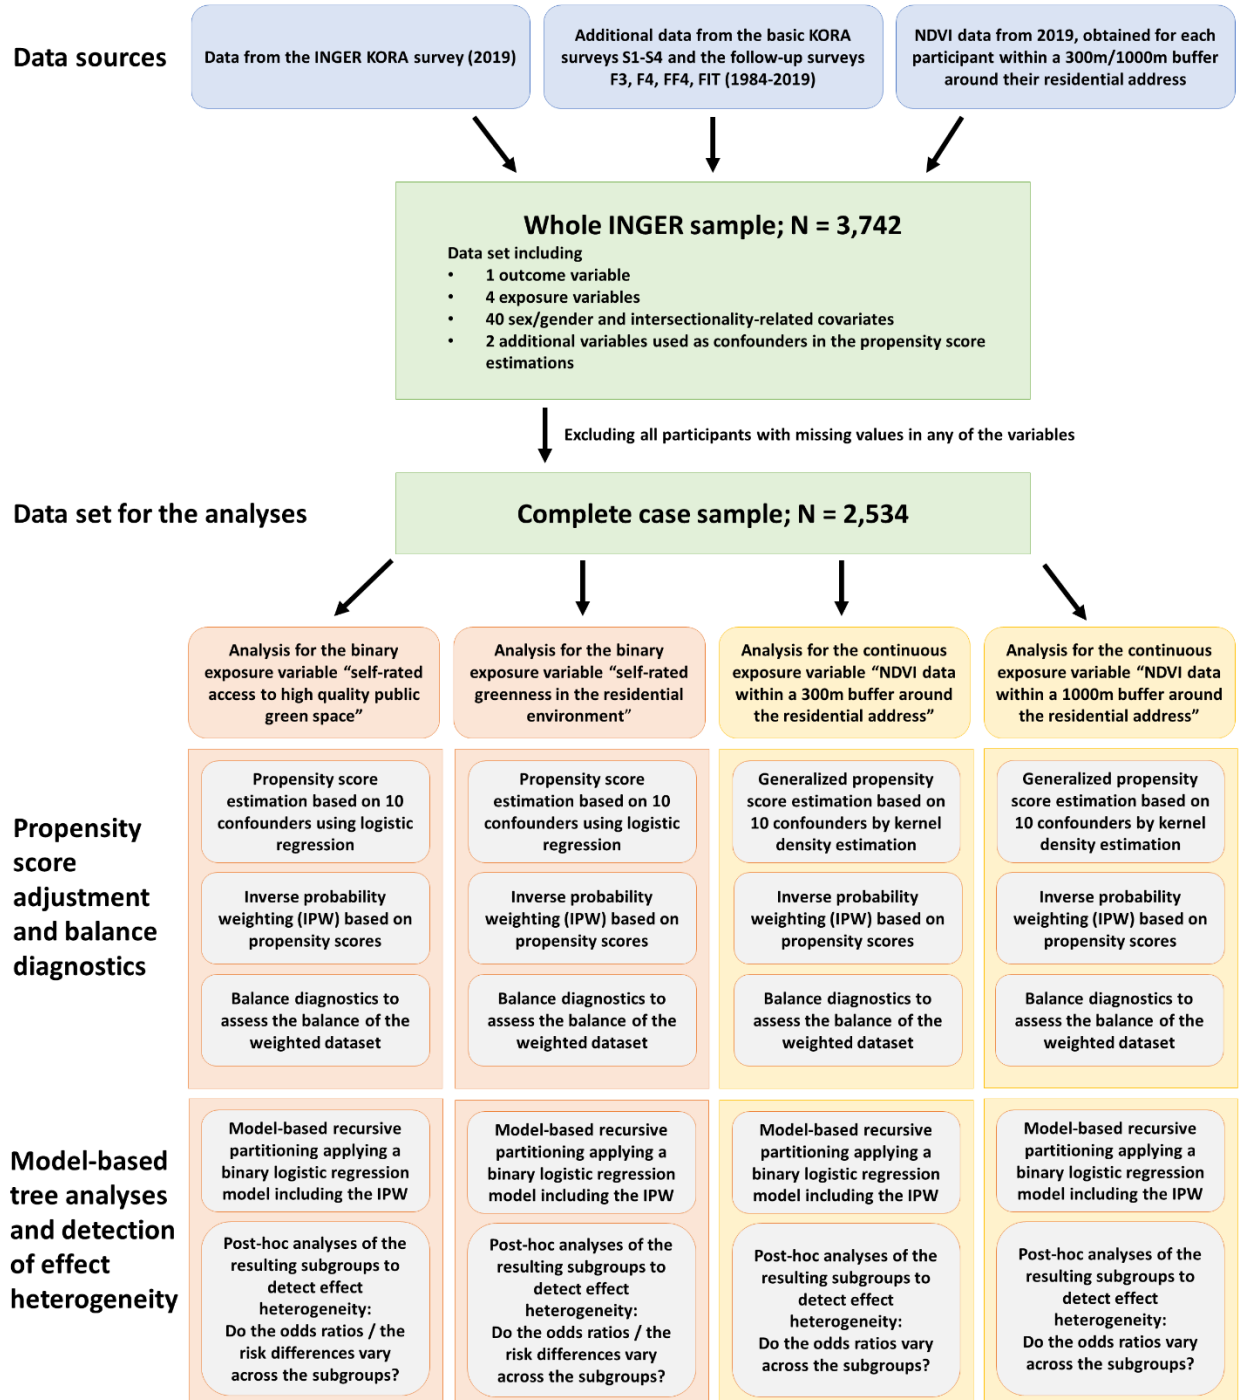

**Supplementary Figure S1:** A research structure diagram to visually summarise the research process of our main analyses with 40 sex/gender and intersectionality-related covariates

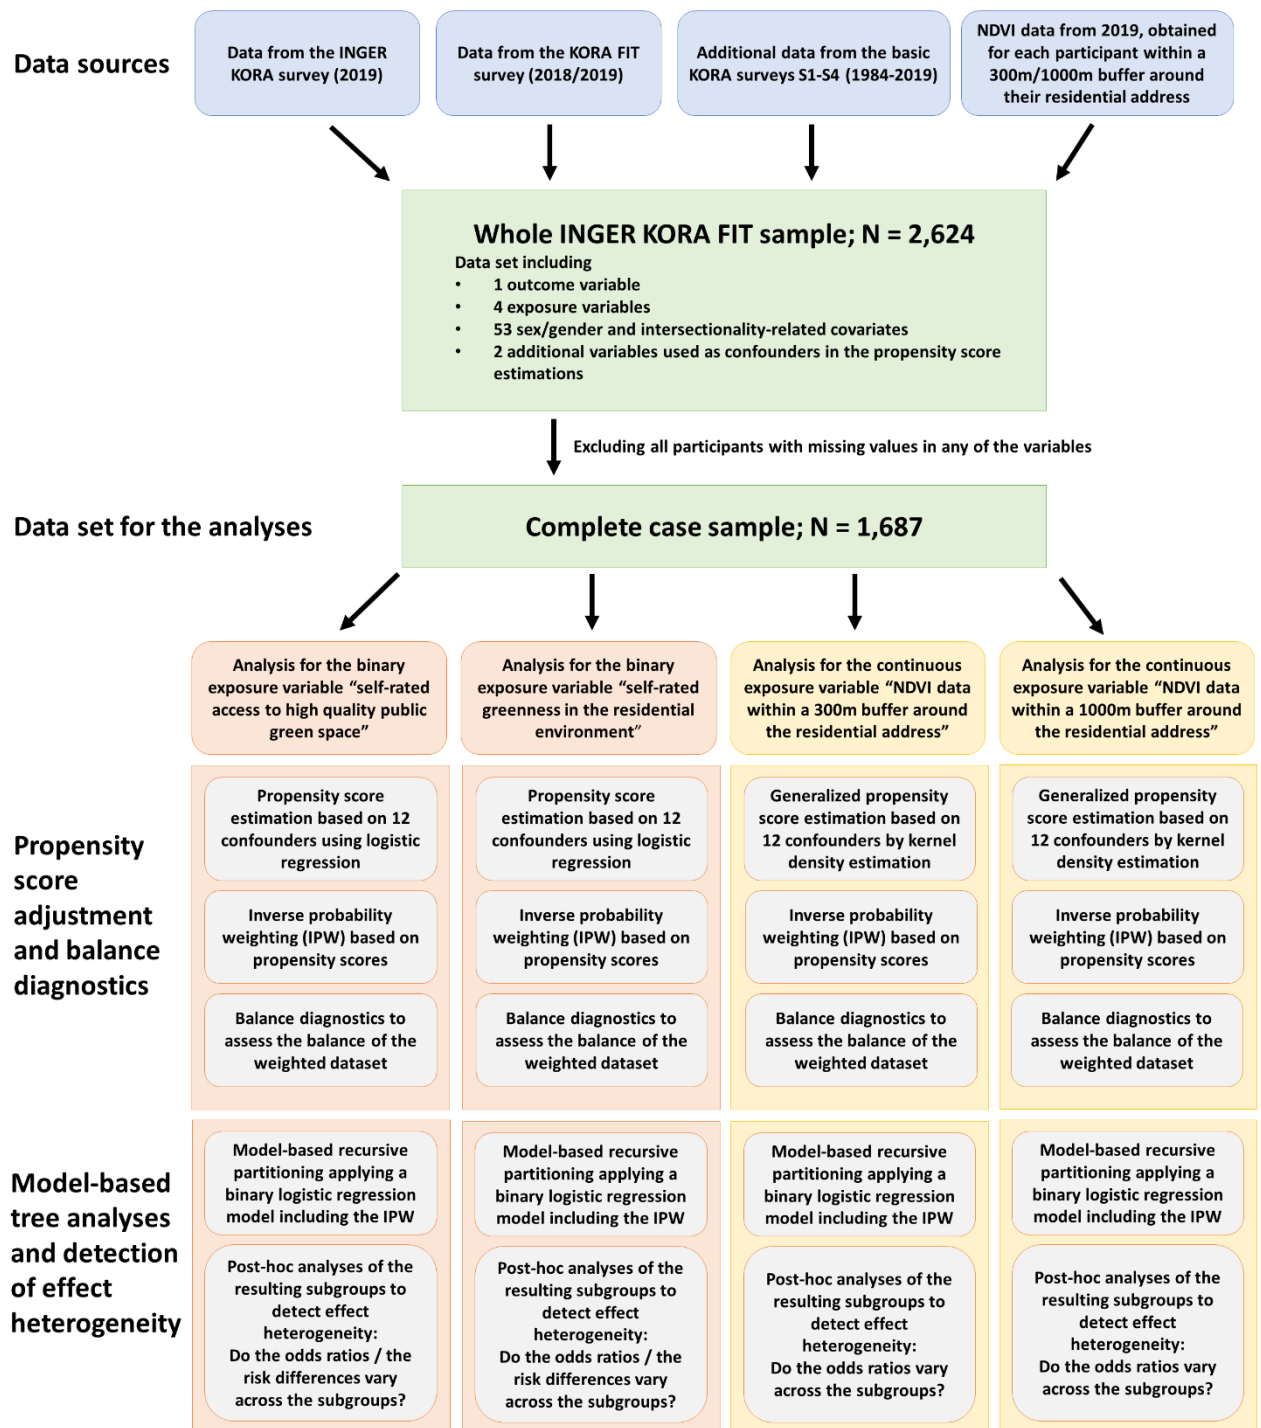

**Supplementary Figure S2:** A research structure diagram to visually summarise the research process of our additional analyses for the INGER KORA FIT subsample with 53 sex/gender and intersectionality-related covariates

**Supplementary Table S1: Distribution of the 40 sex/gender and intersectionality-related covariates in the complete case sample**

| Covariate name and question in INGER KORA survey <sup>1</sup>                 | Response categories and distribution in the complete case sample; N = 2,543 (100 %) |
|-------------------------------------------------------------------------------|-------------------------------------------------------------------------------------|
| <b>Individual sex/gender self-concept</b>                                     |                                                                                     |
| <b>Sex assigned at birth</b>                                                  |                                                                                     |
| <b>SexAtBirth</b>                                                             | 1,339 (52.8) = female                                                               |
| What sex were you assigned at birth?                                          | 1,195 (47.2) = male                                                                 |
| <b>Current sex/gender identity</b>                                            |                                                                                     |
| <b>SGIdentity</b>                                                             | 1,334 (52.6) = female                                                               |
| What is your current sex/gender identity?                                     | 1,184 (46.7) = male                                                                 |
| (Multiple responses possible)                                                 | 2 (0.1) = trans, trans man, trans woman                                             |
|                                                                               | 0 (0.0) = an identity not mentioned here                                            |
|                                                                               | 8 (0.3) = I do not want to classify as any sex/gender category                      |
|                                                                               | 2 (0.1) = female AND I do not want to classify as any sex/gender category           |
|                                                                               | 2 (0.1) = male AND an identity not mentioned here                                   |
|                                                                               | 2 (0.1) = male AND I do not want to classify as any sex/gender category             |
| <b>Internalized sex/gender roles</b>                                          |                                                                                     |
| <b>SGRolesFemMasculineFeeling</b>                                             | 299 (11.8) = very masculine                                                         |
| I mostly perceive myself as ...                                               | 646 (25.5) = mainly masculine                                                       |
|                                                                               | 213 (8.4) = a little masculine                                                      |
|                                                                               | 293 (11.6) = just as feminine as masculine                                          |
|                                                                               | 118 (4.7) = a little feminine                                                       |
|                                                                               | 664 (26.2) = mainly feminine                                                        |
|                                                                               | 301 (11.9) = very feminine                                                          |
| <b>SGRolesFemMasculineWish</b>                                                | 362 (14.3) = very masculine                                                         |
| Ideally, I would like to be ...                                               | 636 (25.1) = mainly masculine                                                       |
|                                                                               | 132 (5.2) = a little masculine                                                      |
|                                                                               | 288 (11.4) = just as feminine as masculine                                          |
|                                                                               | 112 (4.4) = a little feminine                                                       |
|                                                                               | 622 (24.5) = mainly feminine                                                        |
|                                                                               | 382 (15.1) = very feminine                                                          |
| <b>SGRolesFemMasculineChange</b>                                              | 264 (10.4) = yes                                                                    |
| Has your assessment of what is feminine or masculine changed in recent years? | 2,270 (89.6) = no                                                                   |
| <b>SGRolesBothIncomeContribute</b>                                            | 1,163 (45.9) = strongly agree                                                       |
| Both the men and women should contribute to the household income.             | 707 (27.9) = rather agree                                                           |
|                                                                               | 575 (22.7) = neither agree nor disagree                                             |
|                                                                               | 72 (2.8) = rather disagree                                                          |
|                                                                               | 17 (0.7) = strongly disagree                                                        |
| <b>SGRolesMenMoneyWomenHouse</b>                                              | 55 (2.2) = strongly agree                                                           |
|                                                                               | 195 (7.7) = rather agree                                                            |
|                                                                               | 585 (23.1) = neither agree nor disagree                                             |

|                                                                                                                                                                    |                                                                                                                                                                                                                                            |
|--------------------------------------------------------------------------------------------------------------------------------------------------------------------|--------------------------------------------------------------------------------------------------------------------------------------------------------------------------------------------------------------------------------------------|
| The man's job is to earn money; a woman's job is to look after the home and family.                                                                                | 735 (29.0) = rather disagree<br>964 (38.0) = strongly disagree                                                                                                                                                                             |
| <b>SGRolesGoodRelationshipWorkingMom</b><br>A working mother can establish just as warm and secure a relationship with her children as a mother who does not work. | 1,251 (49.4) = strongly agree<br>690 (27.2) = rather agree<br>409 (16.1) = neither agree nor disagree<br>157 (6.2) = rather disagree<br>27(1.1) = strongly disagree                                                                        |
| <b>SGRolesWomenWorkChildSuffer</b><br>A pre-school child is likely to suffer if his or her mother works.                                                           | 272 (10.7) = strongly agree<br>691 (27.3) = rather agree<br>770 (30.4) = neither agree nor disagree<br>506 (20.0) = rather disagree<br>295 (11.6) = strongly disagree                                                                      |
| <b>SGRolesWomenWorkFamilySuffer</b><br>All in all, family life suffers when the woman is working.                                                                  | 88 (3.5) = strongly agree<br>389 (15.4) = rather agree<br>939 (37.1) = neither agree nor disagree<br>699 (27.6) = rather disagree<br>419 (16.5) = strongly disagree                                                                        |
| <b>SGRolesHousewifeFulfilling</b><br>Being a housewife is just as fulfilling as working for pay.                                                                   | 327 (12.9) = strongly agree<br>440 (17.4) = rather agree<br>743 (29.3) = neither agree nor disagree<br>728 (28.7) = rather disagree<br>296 (11.7) = strongly disagree                                                                      |
| <b>SGRolesHousehusbandFulfilling</b><br>Being a househusband is just as fulfilling as working for pay.                                                             | 187 (7.4) = strongly agree<br>332 (13.1) = rather agree<br>733 (28.9) = neither agree nor disagree<br>884 (34.9) = rather disagree<br>398 (15.7) = strongly disagree                                                                       |
| <b>SGRolesSingleParentEqual</b><br>One parent can raise a child as well as two parents together.                                                                   | 232 (9.2) = strongly agree<br>423 (16.7) = rather agree<br>802 (31.6) = neither agree nor disagree<br>818 (32.3) = rather disagree<br>259 (10.2) = strongly disagree                                                                       |
| <b>SGRolesSameSexEqual</b><br>A same-sex couple can raise a child as well as a male-female couple.                                                                 | 444 (17.5) = strongly agree<br>591 (23.3) = rather agree<br>618 (24.4) = neither agree nor disagree<br>486 (19.2) = rather disagree<br>395 (15.6) = strongly disagree                                                                      |
| <b>Externalized sex/gender expressions</b>                                                                                                                         |                                                                                                                                                                                                                                            |
| <b>SGExpressionLooks</b><br>How would other people generally describe you based on your appearance, clothing style and other visual characteristics?               | 308 (12.2) = very masculine<br>670 (26.4) = mainly masculine<br>179 (7.1) = a little masculine<br>227 (9.0) = just as feminine as masculine<br>186 (7.3) = a little feminine<br>690 (27.2) = mainly feminine<br>274 (10.8) = very feminine |
| <b>SGExpressionBehavior</b><br>How would other people generally describe you based on your behaviors?                                                              | 289 (11.4) = very masculine<br>662 (26.1) = mainly masculine<br>218 (8.6) = a little masculine<br>301 (11.9) = just as feminine as masculine<br>171 (6.7) = a little feminine<br>656 (25.9) = mainly feminine<br>237 (9.4) = very feminine |

|                                                                       |                                                                            |
|-----------------------------------------------------------------------|----------------------------------------------------------------------------|
| <b>SGExpressionSAGE</b>                                               | 642 (25.3) = 1,0 – 1,5 ( <i>high socially assigned gender conformity</i> ) |
| SGExpressionLooks +                                                   | 1,292 (51.0) = 2,0 – 2,5                                                   |
| SGExpressionBehavior                                                  | 358 (14.1) = 3,0 – 3,5                                                     |
| (seven-point scales ranging from “very feminine” to “very masculine”) | 210 (8.3) = 4,0 – 4,5                                                      |
|                                                                       | 30 (1.2) = 5,0 – 5,5                                                       |
|                                                                       | 1 (0.0) = 6,0 – 6,5                                                        |
| SAGE-Score values: 1,0 – 7,0                                          | 1 (0.0) = 7,0 ( <i>low socially assigned gender conformity</i> )           |
| low values = high socially assigned gender conformity                 |                                                                            |
|                                                                       | 2.19 = mean                                                                |
|                                                                       | 0.92 = SD                                                                  |
|                                                                       | 1.00 = min                                                                 |
|                                                                       | 7.00 = max                                                                 |

### Items contributing to explain structural sex/gender relations

|                                                                                   |                                         |
|-----------------------------------------------------------------------------------|-----------------------------------------|
| <b>Experience of discrimination</b>                                               |                                         |
| <b>DiscriminationSocialPosition</b>                                               | 24 (0.9) = strongly agree               |
| I have the feeling to be disadvantaged because of my position in society.         | 125 (4.9) = rather agree                |
|                                                                                   | 229 (9.0) = neither agree nor disagree  |
|                                                                                   | 971 (38.3) = rather disagree            |
|                                                                                   | 1,185 (46.8) = strongly disagree        |
| <b>DiscriminationAge</b>                                                          | 26 (1.0) = strongly agree               |
| I have the feeling to be disadvantaged because of my age.                         | 165 (6.5) = rather agree                |
|                                                                                   | 275 (10.9) = neither agree nor disagree |
|                                                                                   | 936 (36.9) = rather disagree            |
|                                                                                   | 1,132 (44.7) = strongly disagree        |
| <b>DiscriminationHeight</b>                                                       | 11 (0.4) = strongly agree               |
| I have the feeling to be disadvantaged because of my height.                      | 41 (1.6) = rather agree                 |
|                                                                                   | 92 (3.6) = neither agree nor disagree   |
|                                                                                   | 627 (24.7) = rather disagree            |
|                                                                                   | 1,763 (69.6) = strongly disagree        |
| <b>DiscriminationWeight</b>                                                       | 15 (0.6) = strongly agree               |
| I have the feeling to be disadvantaged because of my weight.                      | 46 (1.8) = rather agree                 |
|                                                                                   | 125 (4.9) = neither agree nor disagree  |
|                                                                                   | 614 (24.2) = rather disagree            |
|                                                                                   | 1,734 (68.4) = strongly disagree        |
| <b>DiscriminationDisability</b>                                                   | 24 (0.9) = strongly agree               |
| I have the feeling to be disadvantaged because of my physical impairment.         | 58 (2.3) = rather agree                 |
|                                                                                   | 145 (5.7) = neither agree nor disagree  |
|                                                                                   | 428 (16.9) = rather disagree            |
|                                                                                   | 1,879 (74.2) = strongly disagree        |
| <b>DiscriminationEthnicity</b>                                                    | 8 (0.3) = strongly agree                |
| I have the feeling to be disadvantaged because of my ethnic/cultural affiliation. | 10 (0.4) = rather agree                 |
|                                                                                   | 34 (1.3) = neither agree nor disagree   |
|                                                                                   | 269 (10.6) = rather disagree            |
|                                                                                   | 2,213 (87.3) = strongly disagree        |
| <b>DiscriminationSG</b>                                                           | 9 (0.4) = strongly agree                |
| I have the feeling to be disadvantaged because of my sex/gender.                  | 28 (1.1) = rather agree                 |
|                                                                                   | 88 (3.5) = neither agree nor disagree   |
|                                                                                   | 331 (13.1) = rather disagree            |
|                                                                                   | 2,078 (82.0) = strongly disagree        |
|                                                                                   | 8 (0.3) = strongly agree                |

|                                                                                                                     |                                       |
|---------------------------------------------------------------------------------------------------------------------|---------------------------------------|
| <b>DiscriminationSexualOrientation</b>                                                                              | 2 (0.1) = rather agree                |
| I have the feeling to be disadvantaged because of my sexual orientation.                                            | 18 (0.7) = neither agree nor disagree |
|                                                                                                                     | 153 (6.0) = rather disagree           |
|                                                                                                                     | 2,353 (92.9) = strongly disagree      |
| <b>DiscriminationAskedifParentsBornAbroad</b>                                                                       | 289 (11.4) = yes                      |
| Have you ever been asked in Germany whether you or your parents were born abroad?                                   | 2,245 (88.6) = no                     |
| <b>Care and household activities</b>                                                                                |                                       |
| <b>CareActivitiesChildren</b>                                                                                       | 90 (3.6) = only me                    |
| Who is currently taking primary responsibility for the following tasks? ("Other people" also includes your partner) | 225 (8.9) = mainly me                 |
|                                                                                                                     | 829 (32.7) = me and other people      |
|                                                                                                                     | 274 (10.8) = mainly other people      |
|                                                                                                                     | 45 (1.8) = only other people          |
|                                                                                                                     | 1,071 (42.3) = not applicable         |
| Care and/or upbringing of your children/grandchildren, driving services for your children/grandchildren             |                                       |
| <b>CareActivitiesSick</b>                                                                                           | 116 (4.6) = only me                   |
| Who is currently taking primary responsibility for the following tasks? ("Other people" also includes your partner) | 199 (7.9) = mainly me                 |
|                                                                                                                     | 419 (16.5) = me and other people      |
|                                                                                                                     | 184 (7.3) = mainly other people       |
|                                                                                                                     | 50 (2.0) = only other people          |
|                                                                                                                     | 1,566 (61.8) = not applicable         |
| Care for disabled, chronically ill or in need of care family members, neighbours or friends                         |                                       |
| <b>CareActivitiesCooking</b>                                                                                        | 673 (26.6) = only me                  |
| Who is currently taking primary responsibility for the following tasks? ("Other people" also includes your partner) | 522 (20.6) = mainly me                |
|                                                                                                                     | 626 (24.7) = me and other people      |
|                                                                                                                     | 483 (19.1) = mainly other people      |
|                                                                                                                     | 230 (9.1) = only other people         |
| Cooking                                                                                                             |                                       |
| <b>CareActivitiesHousework</b>                                                                                      | 558 (22.0) = only me                  |
| Who is currently taking primary responsibility for the following tasks? ("Other people" also includes your partner) | 608 (24.0) = mainly me                |
|                                                                                                                     | 833 (32.9) = me and other people      |
|                                                                                                                     | 478 (18.9) = mainly other people      |
|                                                                                                                     | 57 (2.2) = only other people          |
| Housework                                                                                                           |                                       |
| <b>CareActivitiesGardening</b>                                                                                      | 337 (13.3) = only me                  |
|                                                                                                                     | 490 (19.3) = mainly me                |

|                                                                                                                                                                               |                                                                                                                                                                                                                        |
|-------------------------------------------------------------------------------------------------------------------------------------------------------------------------------|------------------------------------------------------------------------------------------------------------------------------------------------------------------------------------------------------------------------|
| Who is currently taking primary responsibility for the following tasks? ("Other people" also includes your partner)                                                           | 1,031 (40.7) = me and other people<br>301 (11.9) = mainly other people<br>68 (2.7) = only other people<br>307 (12.1) = not applicable                                                                                  |
| Gardening (during the gardening season)                                                                                                                                       |                                                                                                                                                                                                                        |
| <b>CareActivitiesErrands</b>                                                                                                                                                  | 501 (19.8) = only me                                                                                                                                                                                                   |
| Who is currently taking primary responsibility for the following tasks? ("Other people" also includes your partner)                                                           | 557 (22.0) = mainly me<br>1,100 (43.4) = me and other people<br>328 (12.9) = mainly other people<br>48 (1.9) = only other people                                                                                       |
| Errands (shopping, procurement)                                                                                                                                               |                                                                                                                                                                                                                        |
| <b>CareActivitiesHandicraft</b>                                                                                                                                               | 478 (18.9) = only me                                                                                                                                                                                                   |
| Who is currently taking primary responsibility for the following tasks? ("Other people" also includes your partner)                                                           | 666 (26.3) = mainly me<br>613 (24.2) = me and other people<br>594 (23.4) = mainly other people<br>183 (7.2) = only other people                                                                                        |
| Handicraft tasks in the household                                                                                                                                             |                                                                                                                                                                                                                        |
| <b>Intersectionality-related social categories</b>                                                                                                                            |                                                                                                                                                                                                                        |
| <b>SGRelationsSchoolEducation</b>                                                                                                                                             | 1,062 (41.9) = Degree after German basic secondary school ( <i>Hauptschulabschluss</i> )                                                                                                                               |
| School education<br>(Variable from basic KORA studies S1-S4)                                                                                                                  | 793 (31.3) = German O-levels ( <i>Mittlere Reife</i> )<br>679 (26.8) = German A-Levels ( <i>Abitur</i> )                                                                                                               |
| <b>SGRelationsVocationalEducation</b>                                                                                                                                         | 157 (6.2) = no vocational qualification                                                                                                                                                                                |
| Highest vocational qualification<br>(Variable from basic KORA studies S1-S4)                                                                                                  | 1,358 (53.6) = vocational school / apprenticeship<br>504 (19.9) = technical school / master school<br>22 (0.9) = engineering school / polytechnical school<br>493 (19.5) = university of applied sciences / university |
| <b>SGRelationsEmployment</b>                                                                                                                                                  | 1,328 (52.4) = no                                                                                                                                                                                                      |
| Are you employed?                                                                                                                                                             | 13 (0.5) = 1-5 h/week<br>97 (3.8) = 6-10 h/week<br>168 (6.6) = 11-20 h/week                                                                                                                                            |
| If so: How many hours do you work on average per week (actual working hours)?                                                                                                 | 176 (6.9) = 21-30 h/week<br>454 (17.9) = 31-40 h/week<br>228 (9.0) = 41-50 h/week<br>70 (2.8) = > 50 h/week                                                                                                            |
| <b>SGRelationsIncome</b>                                                                                                                                                      | 295 (11.6) = very good                                                                                                                                                                                                 |
| How do you assess your financial situation?                                                                                                                                   | 1,645 (64.9) = good<br>559 (22.1) = moderate<br>35 (1.4) = bad                                                                                                                                                         |
| <b>SGRelationsFamilySituation</b>                                                                                                                                             |                                                                                                                                                                                                                        |
| Do you live with a spouse or partner in a shared household?<br>(Variable from KORA surveys F3, F4, FF4, FIT; the latest available information from each participant was used) | 2,045 (80.7) = yes<br>489 (19.3) = no                                                                                                                                                                                  |

---

**SGRelationsUrbanisation**

Distribution of participants by degree of  
urbanisation.

902 (35.6) = city

1,091 (43.1) = suburb

541 (21.3) = rural

---

<sup>1</sup>*Original questions were asked in German*



**Supplementary Table S2: Additional 13 sex/gender and intersectionality-related covariates within the INGER KORA FIT sample**

| Covariate Name and question<br>in INGER KORA FIT survey <sup>1</sup>                                                                   | Response categories and distribution in the<br>INGER KORA FIT complete case sample; N = 1,687 (100 %) |                                                                                                                                         |
|----------------------------------------------------------------------------------------------------------------------------------------|-------------------------------------------------------------------------------------------------------|-----------------------------------------------------------------------------------------------------------------------------------------|
| Items contributing to explain structural sex/gender relations                                                                          |                                                                                                       |                                                                                                                                         |
| Intersectionality-related social categories                                                                                            |                                                                                                       |                                                                                                                                         |
| <b>SGRelationsEmploymentCategories</b>                                                                                                 | 755 (44.8)                                                                                            | = a pensioner                                                                                                                           |
| Which of the following statements applies to you?                                                                                      | 73 (4.3)                                                                                              | = in partial retirement                                                                                                                 |
| Are you currently ...                                                                                                                  | 707 (41.9)                                                                                            | = working                                                                                                                               |
|                                                                                                                                        | 34 (2.0)                                                                                              | = unemployed                                                                                                                            |
|                                                                                                                                        | 118 (7.0)                                                                                             | = other status (e.g. housewife/<br>househusband, in training, other leave of<br>absence)                                                |
| <b>SGRelationsOccupation</b>                                                                                                           | 22 (1.3)                                                                                              | = unskilled worker                                                                                                                      |
| What position do you have, or did you have in your job?                                                                                | 66 (3.9)                                                                                              | = Civil servant simple activity / semi-skilled worker                                                                                   |
| + one of four more detailed follow-up questions depending on the initial response (worker, employee, civil-servant or self-employed)   | 234 (13.9)                                                                                            | = Civil servant simple service / skilled worker                                                                                         |
|                                                                                                                                        | 98 (5.8)                                                                                              | = Civil servant middle service / skilled worker or foreman                                                                              |
|                                                                                                                                        | 31 (1.8)                                                                                              | = Master craftsman / foreman                                                                                                            |
|                                                                                                                                        | 698 (41.4)                                                                                            | = Civil servants higher service / employee with qualified activity                                                                      |
|                                                                                                                                        | 100 (5.9)                                                                                             | = Self-employed, max. 1 employee                                                                                                        |
|                                                                                                                                        | 386 (22.9)                                                                                            | = Civil servant higher service / employee with highly qualified activity / self-employed academic / self-employed with max. 9 employees |
|                                                                                                                                        | 52 (3.1)                                                                                              | = Employees with extensive managerial responsibilities / self-employed with at least 10 employees                                       |
| <b>SGRelationsIncomeEuro</b>                                                                                                           | Continuous                                                                                            | variable (€)                                                                                                                            |
| Equivalent income = the household's income divided by the number of consumption units in the household.                                | 1937.00                                                                                               | = mean                                                                                                                                  |
|                                                                                                                                        | 920.34                                                                                                | = SD                                                                                                                                    |
|                                                                                                                                        | 185.00                                                                                                | = min                                                                                                                                   |
|                                                                                                                                        | 8000.00                                                                                               | = max                                                                                                                                   |
| (To calculate this, participants were asked about their household income and number of households' members and the age of the members) |                                                                                                       |                                                                                                                                         |
| <b>SGRelationsHouseholdMembers</b>                                                                                                     | 314 (18.6)                                                                                            | = 1                                                                                                                                     |
| How many people live in your household at all times, including yourself?                                                               | 1,061 (62.9)                                                                                          | = 2                                                                                                                                     |
|                                                                                                                                        | 204 (12.1)                                                                                            | = 3                                                                                                                                     |
|                                                                                                                                        | 78 (4.6)                                                                                              | = 4                                                                                                                                     |
|                                                                                                                                        | 25 (1.5)                                                                                              | = 5                                                                                                                                     |
|                                                                                                                                        | 3 (0.2)                                                                                               | = 6                                                                                                                                     |

0 (0.0) = 7

1 (0.1) = 8

1 (0.1) = 9

---

**SGRelationsDisability**

Do you have a recognized disability?

If yes, what degree of disability do you have?

1,367 (81.0) = no disability

104 (6.2) = disability 10 - 30%

165 (9.8) = disability 40 - 60%

51 (3.0) = disability 70-100%

---

**SGRelationsMobility**

Please indicate which of the following statements best describes your current state of health regarding mobility.

1,239 (73.4) = I have no problems moving around

272 (16.1) = I have little problems moving around

137 (8.1) = I have moderate problems moving around

39 (2.3) = I have big problems moving around / I am unable to move

---

**Life-style and psychological factors****Health Behaviors****HealthBehaviorAlcohol**

Alcohol consumption (g /day)

Continuous variable

15.12 = mean

19.30 = SD

(To calculate this, participants were asked about their consumption of different kind of alcoholic drinks on weekends or working days)

0.00 = min

160.00 = max

---

**HealthBehaviorSmoking**

Smoking behavior based on three interview questions

191 (11.3) = regular smoker

35 (2.1) = irregular smoker

710 (42.1) = ex-smoker

751 (44.5) = never-smoker

a) Do you currently smoke cigarettes?

b) Do you smoke regularly or irregularly (i.e. usually less than one cigarette a day)?

c) Have you ever smoked cigarettes?

---

**HealthBehaviorPhysicalActivity**

How often do you do sports in winter/summer?

655 (38.8) = regularly > 2h a week

586 (34.7) = regularly ~ 1h a week

215 (12.7) = irregularly ~ 1h a week

231 (13.7) = almost no or no physical activity

---

**Psychosocial Factors****LifeSatisfaction**

Overall, how satisfied are you with your life right now?

Continuous variable

7.46 = mean

2.18 = SD

0.00 = min

on a scale from 0 (totally dissatisfied) – 10 (completely satisfied)

10.00 = max

---

**PerceivedStress**

Based on 10 questions of the German version of the Perceived Stress Scale (see Klein [62]) for exact formulation of questions)

|            |          |
|------------|----------|
| Continuous | variable |
| 14.31      | = mean   |
| 5.57       | = SD     |
| 0.00       | = min    |
| 34.00      | = max    |

Scores are obtained by reversing responses to four positively stated items and then summing across all scale items. Higher scores indicated a higher level of perceived stress.

### SelfEfficacy

Self-efficacy scale (ASKU, see Beierlein [63])

|            |          |
|------------|----------|
| Continuous | variable |
| 4.04       | = mean   |
| 0.57       | = SD     |
| 1.00       | = min    |
| 5.00       | = max    |

Score is based on three statements on a scale from 1 (strongly disagree) – 5 (strongly agree):

- a) I can rely on my own abilities in difficult situations.
- b) I am able to solve most problems on my own.
- c) I can usually solve even challenging and complex tasks well.

Score is the average response to these three statements.

### OptimismPessimism

Based on questions of the German version of the Life-Orientation-Test (LOT-R) for dispositional optimism and pessimism [64]

|            |          |
|------------|----------|
| Continuous | variable |
| 7.49       | = mean   |
| 3.60       | = SD     |
| 0.00       | = min    |
| 20.00      | = max    |

Scores are obtained by reversing responses to positively stated items and then summing across all scale items. Higher scores indicated a higher level of pessimism.

<sup>1</sup>Original questions were asked in German

- 62. Klein E.M.; Brahler E.; Dreier M.; Reinecke L.; Muller K.W.; Schmutzer G.; Wolfling K.; Beutel M.E. The German version of the Perceived Stress Scale - psychometric characteristics in a representative German community sample. *BMC Psychiatry* **2016**, *16*, 159. doi:10.1186/s12888-016-0875-9
- 63. Beierlein C.; Kovaleva A.; Kemper C.J.; Rammstedt B. *ASKU - Allgemeine Selbstwirksamkeit Kurzskala [Fragebogen]*. Elektronisches Testarchiv (PSYNDEX Tests-Nr. 9006490). Trier: ZPID.: Leibniz-Zentrum für Psychologische Information und Dokumentation (ZPID); 2012.
- 64. Scheier M.F.; Carver C.S.; Bridges M.W. Distinguishing optimism from neuroticism (and trait anxiety, self-mastery, and self-esteem): a reevaluation of the Life Orientation Test. *J Pers Soc Psychol* **1994**, *67*(6), 1063-78. doi:10.1037//0022-3514.67.6.1063

**Supplementary Table S3: Comparison of the whole INGER sample with the complete case sample**

| Variable                                   | Response categories                                                                                                                                                                                             | Distribution in the whole INGER sample; N = 3,742 (100 %)                                                      | Distribution in the complete case sample; N = 2,534 (100 %)                                               |
|--------------------------------------------|-----------------------------------------------------------------------------------------------------------------------------------------------------------------------------------------------------------------|----------------------------------------------------------------------------------------------------------------|-----------------------------------------------------------------------------------------------------------|
| Age in years                               | mean =<br>SD =<br>min =<br>max =                                                                                                                                                                                | 63.41<br>9.42<br>43<br>92                                                                                      | 62.69<br>8.87<br>43<br>90                                                                                 |
| Sex/gender identity                        | I don't want to classify=<br>female =<br>female and I don't want to classify =<br>male =<br>male and I don't want to classify=<br>male and other identity =<br>other identity =<br>transsexual =<br>60 missings | 14 (0.4)<br>1,998 (54.3)<br>3 (0.1)<br>1,650 (44.8)<br>7 (0.2)<br>4 (0.1)<br>4 (0.1)<br>2 (0.1)<br>60 missings | 8 (0.3)<br>1,334 (52.6)<br>2 (0.1)<br>1,184 (46.7)<br>2 (0.1)<br>2 (0.1)<br>0 (0.0)<br>2 (0.1)<br>2 (0.1) |
| Sex assigned at birth                      | female =<br>male =<br>divers / intersexual =<br>44 missings                                                                                                                                                     | 2,014 (54.5)<br>1,684 (45.5)<br>0 (0.0)<br>44 missings                                                         | 1,339 (52.8)<br>1,195 (47.2)<br>0 (0.0)<br>0 (0.0)                                                        |
| School education                           | basic secondary school degree =<br>German O-Levels =<br>German A-Levels =<br>1 missing                                                                                                                          | 1,736 (46.4)<br>1,085 (29.0)<br>920 (24.6)<br>1 missing                                                        | 1,062 (41.9)<br>793 (31.3)<br>679 (26.8)<br>1 missing                                                     |
| Employment                                 | Yes =<br>No =<br>91 missings                                                                                                                                                                                    | 1,681 (46.0)<br>1,970 (54.0)<br>91 missings                                                                    | 1,206 (47.6)<br>1,328 (52.4)<br>1,328 (52.4)                                                              |
| Self-rated financial situation             | very good =<br>good =<br>moderate =<br>bad =<br>42 missings                                                                                                                                                     | 394 (10.6)<br>2,303 (62.2)<br>937 (25.3)<br>66 (1.8)<br>42 missings                                            | 295 (11.6)<br>1,645 (64.9)<br>559 (22.1)<br>35 (1.4)<br>35 (1.4)                                          |
| Degree of urbanisation.                    | city =<br>suburb =<br>rural =<br>460 missings                                                                                                                                                                   | 1,139 (34.7)<br>1,392 (42.4)<br>751 (22.9)<br>460 missings                                                     | 902 (35.6)<br>1,091 (43.1)<br>541 (21.3)<br>541 (21.3)                                                    |
| Self-rated health                          | good =<br>bad =<br>39 missings                                                                                                                                                                                  | 2,728 (73.7)<br>975 (26.3)<br>39 missings                                                                      | 1,926 (76.0)<br>608 (24.0)<br>608 (24.0)                                                                  |
| Access to high quality public green spaces | high quality green spaces =<br>lower quality and no green spaces =<br>163 missings                                                                                                                              | 1,066 (29.8)<br>2,513 (70.2)<br>163 missings                                                                   | 774 (30.5)<br>1,760 (69.5)<br>1,760 (69.5)                                                                |
| Greenness in the residential environment   | very green =<br>less green =<br>22 missings                                                                                                                                                                     | 2,911 (78.3)<br>809 (21.7)<br>22 missings                                                                      | 2,008 (79.2)<br>526 (20.8)<br>526 (20.8)                                                                  |
| Greenness within a 300 m buffer (NDVI)     | mean =<br>SD =<br>min =<br>max =                                                                                                                                                                                | 0.47<br>0.09<br>0.16<br>0.73                                                                                   | 0.47<br>0.09<br>0.16<br>0.73                                                                              |

|                                                        |        |      |      |
|--------------------------------------------------------|--------|------|------|
| <b>Greenness within a<br/>1000 m buffer<br/>(NDVI)</b> | mean = | 0.50 | 0.50 |
|                                                        | SD =   | 0.09 | 0.09 |
|                                                        | min =  | 0.27 | 0.27 |
|                                                        | max =  | 0.71 | 0.71 |
